# Supplementary material for: Detection of depression in low resource settings: validation of the Patient Health Questionnaire (PHQ-9) and cultural concepts of distress in Nepal
Source: BMC Psychiatry. 2016 Mar 8;16:58. doi: 10.1186/s12888-016-0768-y (PMC4782581; doi:10.1186/s12888-016-0768-y)
Supplement: Additional file 2: — Data file. (XLSX 45 kb) [file 12888_2016_768_MOESM2_ESM.xlsx]

## Sheet: Data_File_Nepal_PHQ9_Validation
b_1_1	b_1_2	b_1_3	b_1_4	b_1_5	b_1_6	PHQ9_1	PHQ9_2	PHQ9_3	PHQ9_4	PHQ9_5	PHQ9_6	PHQ9_7	PHQ9_8	PHQ9_9	PHQ9_10	HeartMind	BrainMind	EVER_PSYCH	SC21	SC21_i	SC22	SC22_i	SC23	SC23_i	D24_f	D24_f_i	D64_a	D64_a_i	D64_d	D64_d_i	D64_e	D64_e_i	D64_f	D64_f_i	D64_g	D64_g_i	D64_h	D64_h_i	D64_i	D64_i_i	D64_J	D64_J_i	D64_k	D64_k_i	D64_L	D64_L_i	D64_M	D64_M_i	D64_N
Gender:	Age	Caste	Religion:	Can you read and write?	Education:	In the past two weeks how often have you had lack of interest in work/lack of happiness or not ongoing your work?	How often in the past two weeks have you been feeling depressed, hopeless or not being able to do anything?	How often in the past two weeks have you been experiencing lack of sleep or sleeping more than usual?	How often in the past two weeks have you been experiencing feeling of tiredness or lack of energy?	How often in the past two weeks have you been feeling loss of appetite or feeling like eating more than usual?	How often in the past two weeks have you been having bad thoughts about own self, feeling like being responsible for own failure or having let your family down? Probe: feeling of prestige down of own and your family due to you	How often in the past two weeks have you not been able to concentrate, eg. Reading newspaper, watching television, cutting grass, cooking curry, Chamal kelauna, Pat gasna focusing on any types of work?	How often in the past two weeks have you been speaking or moving so slowly that others have noticed you or felt restless and moved more than usual?	How often in the past two weeks have you felt like dying or having thoughts about harming yourself? (eg. Cutting yourself, taking poison, jumping, banging heads against walls)	How often in the past two weeks have the problems in that you mentioned right now affected your work, yourself care and your care for family and your relationship with others?	Heart-Mind Problems	Brain-Mind Problems	Ever received psychiatric care	In the last 12 months, have you ever had a period lasting more than 2 weeks when most of the day you felt sad, empty or depressed?	In the last 2 weeks, have you ever had a period lasting more than 2 weeks when most of the day you felt sad, empty or depressed?	In the last 12 months,Have you ever had a period lasting several days or longer when most of the day you were very discouraged about how things were going in your life?	In the last 2 weeks, Have you ever had a period lasting several days or longer when most of the day you were very discouraged about how things were going in your life?	In the last 12 months,Have you ever had a period lasting several days or longer when you lost interest in most things you usually enjoy like work, hobbies, and personal relationships?	in the last 2 weeks,Have you ever had a period lasting several days or longer when you lost interest in most things you usually enjoy like work, hobbies, and personal relationships?	In the last 12 months,Did you lose the ability to take pleasure in having good things happen to you, like winning something or being praised or complimented ?	in the last 2 weeks,Did you lose the ability to take pleasure in having good things happen to you, like winning something or being praised or complimented ?	In the last 12 months,Here’s the first series, which deals with problems falling asleep	in the last 2 weeks,Here’s the first series, which deals with problems falling asleep	In the last 12 months,Here’s the next series, which deals with the amount of sleep you got each night:	in the last 2 weeks,Here’s the next series, which deals with the amount of sleep you got each night	In the last 12 months,Here’s the next series, which deals with feeling sad:	in the last 2 weeks,Here’s the next series, which deals with feeling sad:	In the last 12 months,Here’s the next series, which deals with your ability to concentrate and make decisions:	in the last 2 weeks,Here’s the next series, which deals with your ability to concentrate and make decisions:	In the last 12 months,Here’s the next series, which deals with feeling down on yourself:	In the last weeks,Here’s the next series, which deals with feeling down on yourself	In the last 12 months,Here’s the next series, which deals with your interest in daily activities:	in the last 2 weeks,Here’s the next series, which deals with your interest in daily activities:	In the last 12 months,Here’s the next series, which deals with your energy:	In the last 2 weeks,Here’s the next series, which deals with your energy	.In the last 12 months, Here’s the next series, which deals with a change in your appetite:	in the last weeks,Here’s the next series, which deals with a change in your appetite:	In the last 12 months,Here’s the next series, which deals with changes in your weight:	in the last 2 weeks,Here’s the next series, which deals with changes in your weight:	In the last 12 months,Here’s the next series, which deals with thoughts of death or suicide:	In the last 2 weeks,Here’s the next series, which deals with thoughts of death or suicide	In the last 12 months,Here’s the next series, which deals with feeling slowed down:	In the last 2 weeks,Here’s the next series, which deals with feeling slowed down	.In the last 12 months, Here’s the last series, which deals with feeling restless:
male	72	Brahmin	Hindu	yes	Secondary level	sometimes	never	never	never	sometimes	never	never	sometimes	never	NEVER	No	No	0	NO	0	NO	0	NO	0	#NULL!	#NULL!	#NULL!	#NULL!	#NULL!	#NULL!	#NULL!	#NULL!	#NULL!	#NULL!	#NULL!	#NULL!	#NULL!	#NULL!	#NULL!	#NULL!	#NULL!	#NULL!	#NULL!	#NULL!	#NULL!	#NULL!	#NULL!	#NULL!	#NULL!
female	72	Brahmin	Hindu	no	#NULL!	ALMOST ALWAYS	sometimes	never	sometimes	never	never	never	never	never	NEVER	No	No	0	NO	0	NO	0	NO	0	#NULL!	#NULL!	#NULL!	#NULL!	#NULL!	#NULL!	#NULL!	#NULL!	#NULL!	#NULL!	#NULL!	#NULL!	#NULL!	#NULL!	#NULL!	#NULL!	#NULL!	#NULL!	#NULL!	#NULL!	#NULL!	#NULL!	#NULL!	#NULL!	#NULL!
female	21	giri	Hindu	yes	Primary level	sometimes	never	never	OFTEN	never	never	never	never	sometimes	NEVER	No	No	0	NO	0	NO	0	NO	0	#NULL!	#NULL!	#NULL!	#NULL!	#NULL!	#NULL!	#NULL!	#NULL!	#NULL!	#NULL!	#NULL!	#NULL!	#NULL!	#NULL!	#NULL!	#NULL!	#NULL!	#NULL!	#NULL!	#NULL!	#NULL!	#NULL!	#NULL!	#NULL!	#NULL!
male	65	Brahmin	Hindu	yes	Primary level	sometimes	never	OFTEN	sometimes	never	never	never	never	never	NEVER	No	No	0	NO	0	NO	0	NO	0	#NULL!	#NULL!	#NULL!	#NULL!	#NULL!	#NULL!	#NULL!	#NULL!	#NULL!	#NULL!	#NULL!	#NULL!	#NULL!	#NULL!	#NULL!	#NULL!	#NULL!	#NULL!	#NULL!	#NULL!	#NULL!	#NULL!	#NULL!	#NULL!	#NULL!
male	18	tharu	Hindu	yes	Secondary level	never	never	never	never	never	never	never	sometimes	never	NEVER	No	No	0	NO	0	NO	0	NO	0	#NULL!	#NULL!	#NULL!	#NULL!	#NULL!	#NULL!	#NULL!	#NULL!	#NULL!	#NULL!	#NULL!	#NULL!	#NULL!	#NULL!	#NULL!	#NULL!	#NULL!	#NULL!	#NULL!	#NULL!	#NULL!	#NULL!	#NULL!	#NULL!	#NULL!
male	30	tharu	Hindu	yes	SLC Pass	sometimes	never	sometimes	ALMOST ALWAYS	sometimes	never	sometimes	sometimes	never	SOMETIMES	No	No	0	YES	1	NO	0	YES	1	NO	0	You took more than 60 minutes to fall asleep, more than half the time.	2	You slept no longer than 7-8 hours/night, without napping during the day.	1	You felt sad nearly all the time.	1	There was no change in your usual capacity to concentrate or make decisions.	0	You saw yourself as equally worthwhile and deserving as other people.	0	There was no change from usual in how interested you were in other people or activities.	2	You got tired more easily than usual.	2	There was no change in your usual appetite.	0	You lost 5 pounds or more.	4	You did not think of suicide or death.	0	You thought, spoke, and moved at your usual rate of speed.	0	You did not feel restless.
male	30	magar	Hindu	yes	Primary level	sometimes	never	never	never	sometimes	never	never	never	never	NEVER	No	No	1	NO	0	NO	0	NO	0	#NULL!	#NULL!	#NULL!	#NULL!	#NULL!	#NULL!	#NULL!	#NULL!	#NULL!	#NULL!	#NULL!	#NULL!	#NULL!	#NULL!	#NULL!	#NULL!	#NULL!	#NULL!	#NULL!	#NULL!	#NULL!	#NULL!	#NULL!	#NULL!	#NULL!
female	22	tharu	Hindu	yes	Secondary level	sometimes	sometimes	sometimes	OFTEN	sometimes	never	never	sometimes	sometimes	NEVER	No	Yes	0	NO	0	YES	1	NO	0	NO	0	You never took longer than 30 minutes to fall asleep	1	You slept no longer than 7-8 hours/night, without napping during the day.	1	You felt sad less than half the time.	2	You occasionally felt indecisive or found that your attention wandered.	2	You saw yourself as equally worthwhile and deserving as other people.	0	You noticed that you were less interested in people or activities.	2	There was no change in your usual level of activity	0	You ate somewhat less often or lesser amounts of food than usual.	2	You lost 5 pounds or more.	4	You felt that life was empty or wondered if it was worth living.	3	You found that your thinking was slowed down or your voice sounded dull or flat.	2	You did not feel restless.
female	20	darai	Hindu	yes	Primary level	sometimes	never	sometimes	never	sometimes	never	never	never	sometimes	NEVER	No	No	0	NO	0	NO	0	NO	0	#NULL!	#NULL!	#NULL!	#NULL!	#NULL!	#NULL!	#NULL!	#NULL!	#NULL!	#NULL!	#NULL!	#NULL!	#NULL!	#NULL!	#NULL!	#NULL!	#NULL!	#NULL!	#NULL!	#NULL!	#NULL!	#NULL!	#NULL!	#NULL!	#NULL!
female	35	newar	Hindu	no	#NULL!	sometimes	sometimes	never	never	never	never	never	never	sometimes	NEVER	No	No	0	NO	0	NO	0	YES	1	NO	0	You never took longer than 30 minutes to fall asleep	1	You slept no longer than 7-8 hours/night, without napping during the day.	1	You did not feel sad.	0	There was no change in your usual capacity to concentrate or make decisions.	0	You were more self-blaming than usual.	2	There was no change from usual in how interested you were in other people or activities.	0	There was no change in your usual level of activity	0	There was no change in your usual appetite.	0	You did not have a change in your weight.	0	You felt that life was empty or wondered if it was worth living.	2	It took you several seconds to respond to most questions, and you’re sure your thinking was slowed.	3	You did not feel restless.
female	21	dalit	Hindu	yes	Primary level	never	never	never	never	never	never	never	never	sometimes	NEVER	No	No	0	NO	0	NO	0	NO	0	#NULL!	#NULL!	#NULL!	#NULL!	#NULL!	#NULL!	#NULL!	#NULL!	#NULL!	#NULL!	#NULL!	#NULL!	#NULL!	#NULL!	#NULL!	#NULL!	#NULL!	#NULL!	#NULL!	#NULL!	#NULL!	#NULL!	#NULL!	#NULL!	#NULL!
female	19	gurung	Hindu	no	#NULL!	ALMOST ALWAYS	sometimes	sometimes	never	sometimes	never	never	ALMOST ALWAYS	never	SOMETIMES	No	No	0	NO	0	NO	0	NO	0	#NULL!	#NULL!	#NULL!	#NULL!	#NULL!	#NULL!	#NULL!	#NULL!	#NULL!	#NULL!	#NULL!	#NULL!	#NULL!	#NULL!	#NULL!	#NULL!	#NULL!	#NULL!	#NULL!	#NULL!	#NULL!	#NULL!	#NULL!	#NULL!	#NULL!
female	38	Brahmin	Hindu	yes	Primary level	never	sometimes	never	ALMOST ALWAYS	never	never	never	never	never	NEVER	No	No	0	NO	0	NO	0	NO	0	#NULL!	#NULL!	#NULL!	#NULL!	#NULL!	#NULL!	#NULL!	#NULL!	#NULL!	#NULL!	#NULL!	#NULL!	#NULL!	#NULL!	#NULL!	#NULL!	#NULL!	#NULL!	#NULL!	#NULL!	#NULL!	#NULL!	#NULL!	#NULL!	#NULL!
male	55	Brahmin	Hindu	yes	No formal education	never	never	never	sometimes	never	never	never	never	never	NEVER	No	No	0	NO	0	NO	0	NO	0	#NULL!	#NULL!	#NULL!	#NULL!	#NULL!	#NULL!	#NULL!	#NULL!	#NULL!	#NULL!	#NULL!	#NULL!	#NULL!	#NULL!	#NULL!	#NULL!	#NULL!	#NULL!	#NULL!	#NULL!	#NULL!	#NULL!	#NULL!	#NULL!	#NULL!
female	22	Brahmin	Hindu	yes	Intermediate and above	never	never	never	sometimes	never	sometimes	sometimes	never	never	NEVER	No	No	0	YES	1	NO	0	NO	0	NO	0	You took more than 60 minutes to fall asleep, more than half the time.	1	You slept no longer than 7-8 hours/night, without napping during the day.	1	You did not feel sad.	0	There was no change in your usual capacity to concentrate or make decisions.	0	You saw yourself as equally worthwhile and deserving as other people.	0	There was no change from usual in how interested you were in other people or activities.	0	There was no change in your usual level of activity	0	There was no change in your usual appetite.	0	You did not have a change in your weight.	0	You did not think of suicide or death.	0	You thought, spoke, and moved at your usual rate of speed.	0	You did not feel restless.
female	22	giri	Hindu	yes	Primary level	sometimes	never	never	sometimes	sometimes	sometimes	sometimes	sometimes	sometimes	SOMETIMES	No	No	0	NO	0	NO	0	NO	0	#NULL!	#NULL!	#NULL!	#NULL!	#NULL!	#NULL!	#NULL!	#NULL!	#NULL!	#NULL!	#NULL!	#NULL!	#NULL!	#NULL!	#NULL!	#NULL!	#NULL!	#NULL!	#NULL!	#NULL!	#NULL!	#NULL!	#NULL!	#NULL!	#NULL!
male	29	tharu	Hindu	yes	Intermediate and above	never	never	sometimes	never	never	never	sometimes	never	never	NEVER	No	No	0	NO	0	NO	0	NO	0	#NULL!	#NULL!	#NULL!	#NULL!	#NULL!	#NULL!	#NULL!	#NULL!	#NULL!	#NULL!	#NULL!	#NULL!	#NULL!	#NULL!	#NULL!	#NULL!	#NULL!	#NULL!	#NULL!	#NULL!	#NULL!	#NULL!	#NULL!	#NULL!	#NULL!
male	32	tharu	Hindu	yes	SLC Pass	never	never	never	sometimes	never	never	never	never	never	NEVER	No	No	0	NO	0	NO	0	NO	0	#NULL!	#NULL!	#NULL!	#NULL!	#NULL!	#NULL!	#NULL!	#NULL!	#NULL!	#NULL!	#NULL!	#NULL!	#NULL!	#NULL!	#NULL!	#NULL!	#NULL!	#NULL!	#NULL!	#NULL!	#NULL!	#NULL!	#NULL!	#NULL!	#NULL!
male	20	kumal	Hindu	yes	Primary level	never	never	never	OFTEN	never	never	never	sometimes	never	NEVER	No	No	0	NO	0	NO	0	NO	0	#NULL!	#NULL!	#NULL!	#NULL!	#NULL!	#NULL!	#NULL!	#NULL!	#NULL!	#NULL!	#NULL!	#NULL!	#NULL!	#NULL!	#NULL!	#NULL!	#NULL!	#NULL!	#NULL!	#NULL!	#NULL!	#NULL!	#NULL!	#NULL!	#NULL!
male	60	tharu	Hindu	no	#NULL!	sometimes	sometimes	never	never	never	never	never	sometimes	never	NEVER	No	No	0	NO	0	NO	0	NO	0	#NULL!	#NULL!	#NULL!	#NULL!	#NULL!	#NULL!	#NULL!	#NULL!	#NULL!	#NULL!	#NULL!	#NULL!	#NULL!	#NULL!	#NULL!	#NULL!	#NULL!	#NULL!	#NULL!	#NULL!	#NULL!	#NULL!	#NULL!	#NULL!	#NULL!
male	56	magar	Hindu	yes	Secondary level	never	never	never	never	never	never	never	never	never	NEVER	No	No	0	NO	0	NO	0	NO	0	#NULL!	#NULL!	#NULL!	#NULL!	#NULL!	#NULL!	#NULL!	#NULL!	#NULL!	#NULL!	#NULL!	#NULL!	#NULL!	#NULL!	#NULL!	#NULL!	#NULL!	#NULL!	#NULL!	#NULL!	#NULL!	#NULL!	#NULL!	#NULL!	#NULL!
male	25	dalit	Hindu	yes	Primary level	never	never	never	sometimes	sometimes	never	never	sometimes	never	NEVER	No	No	0	NO	0	NO	0	NO	0	#NULL!	#NULL!	#NULL!	#NULL!	#NULL!	#NULL!	#NULL!	#NULL!	#NULL!	#NULL!	#NULL!	#NULL!	#NULL!	#NULL!	#NULL!	#NULL!	#NULL!	#NULL!	#NULL!	#NULL!	#NULL!	#NULL!	#NULL!	#NULL!	#NULL!
male	18	newar	Hindu	yes	Secondary level	never	never	sometimes	sometimes	never	never	never	never	never	NEVER	No	No	0	NO	0	NO	0	NO	0	#NULL!	#NULL!	#NULL!	#NULL!	#NULL!	#NULL!	#NULL!	#NULL!	#NULL!	#NULL!	#NULL!	#NULL!	#NULL!	#NULL!	#NULL!	#NULL!	#NULL!	#NULL!	#NULL!	#NULL!	#NULL!	#NULL!	#NULL!	#NULL!	#NULL!
male	18	tamang	Hindu	yes	SLC Pass	never	sometimes	never	sometimes	sometimes	never	sometimes	never	never	NEVER	No	No	0	NO	0	NO	0	NO	0	#NULL!	#NULL!	#NULL!	#NULL!	#NULL!	#NULL!	#NULL!	#NULL!	#NULL!	#NULL!	#NULL!	#NULL!	#NULL!	#NULL!	#NULL!	#NULL!	#NULL!	#NULL!	#NULL!	#NULL!	#NULL!	#NULL!	#NULL!	#NULL!	#NULL!
male	25	tharu	Hindu	yes	Secondary level	never	sometimes	never	never	never	never	never	never	never	NEVER	No	No	0	NO	0	NO	5	NO	0	#NULL!	#NULL!	#NULL!	#NULL!	#NULL!	#NULL!	#NULL!	#NULL!	#NULL!	#NULL!	#NULL!	#NULL!	#NULL!	#NULL!	#NULL!	#NULL!	#NULL!	#NULL!	#NULL!	#NULL!	#NULL!	#NULL!	#NULL!	#NULL!	#NULL!
male	59	tharu	Hindu	yes	No formal education	sometimes	sometimes	sometimes	sometimes	sometimes	never	sometimes	sometimes	never	NEVER	No	No	0	NO	0	NO	0	NO	0	#NULL!	#NULL!	#NULL!	#NULL!	#NULL!	#NULL!	#NULL!	#NULL!	#NULL!	#NULL!	#NULL!	#NULL!	#NULL!	#NULL!	#NULL!	#NULL!	#NULL!	#NULL!	#NULL!	#NULL!	#NULL!	#NULL!	#NULL!	#NULL!	#NULL!
male	55	tharu	Hindu	no	#NULL!	sometimes	sometimes	never	OFTEN	never	never	sometimes	sometimes	never	NEVER	No	No	0	NO	0	NO	0	NO	0	#NULL!	#NULL!	#NULL!	#NULL!	#NULL!	#NULL!	#NULL!	#NULL!	#NULL!	#NULL!	#NULL!	#NULL!	#NULL!	#NULL!	#NULL!	#NULL!	#NULL!	#NULL!	#NULL!	#NULL!	#NULL!	#NULL!	#NULL!	#NULL!	#NULL!
male	21	gurung	Buddhist	yes	Intermediate and above	never	never	sometimes	never	sometimes	never	never	never	never	NEVER	No	No	0	NO	0	NO	0	NO	0	#NULL!	#NULL!	#NULL!	#NULL!	#NULL!	#NULL!	#NULL!	#NULL!	#NULL!	#NULL!	#NULL!	#NULL!	#NULL!	#NULL!	#NULL!	#NULL!	#NULL!	#NULL!	#NULL!	#NULL!	#NULL!	#NULL!	#NULL!	#NULL!	#NULL!
male	50	tharu	Hindu	yes	No formal education	sometimes	sometimes	never	never	never	never	sometimes	sometimes	never	NEVER	No	No	0	NO	0	NO	0	NO	0	#NULL!	#NULL!	#NULL!	#NULL!	#NULL!	#NULL!	#NULL!	#NULL!	#NULL!	#NULL!	#NULL!	#NULL!	#NULL!	#NULL!	#NULL!	#NULL!	#NULL!	#NULL!	#NULL!	#NULL!	#NULL!	#NULL!	#NULL!	#NULL!	#NULL!
female	22	dalit	Hindu	yes	Primary level	sometimes	OFTEN	OFTEN	ALMOST ALWAYS	sometimes	ALMOST ALWAYS	never	OFTEN	sometimes	SOMETIMES	No	No	0	YES	1	YES	1	YES	1	YES	1	You took more than 60 minutes to fall asleep, more than half the time.	4	You slept no longer than 7-8 hours/night, without napping during the day.	1	You felt sad more than half the time.	4	Most of the time, you struggled to focus your attention or to make decisions.	2	You thought almost constantly about major and minor defects in yourself.	4	You noticed that you were less interested in people or activities.	2	You got tired more easily than usual.	1	You ate much less than usual and only with personal effort.	1	You did not have a change in your weight.	0	You thought of suicide or death several times a day in some detail, or you made specific plans for suicide or actually tried to take your own life.	2	You found that your thinking was slowed down or your voice sounded dull or flat.	2	You were often fidgety, wringing your hands, or needing to shift how you were sitting.
male	54	giri	Hindu	yes	Primary level	never	sometimes	never	sometimes	never	sometimes	sometimes	never	never	NEVER	Yes	No	0	NO	0	NO	0	NO	0	#NULL!	#NULL!	#NULL!	#NULL!	#NULL!	#NULL!	#NULL!	#NULL!	#NULL!	#NULL!	#NULL!	#NULL!	#NULL!	#NULL!	#NULL!	#NULL!	#NULL!	#NULL!	#NULL!	#NULL!	#NULL!	#NULL!	#NULL!	#NULL!	#NULL!
male	26	tharu	Hindu	yes	Secondary level	sometimes	never	never	sometimes	sometimes	OFTEN	never	never	never	NEVER	Yes	No	0	NO	0	NO	0	NO	0	#NULL!	#NULL!	#NULL!	#NULL!	#NULL!	#NULL!	#NULL!	#NULL!	#NULL!	#NULL!	#NULL!	#NULL!	#NULL!	#NULL!	#NULL!	#NULL!	#NULL!	#NULL!	#NULL!	#NULL!	#NULL!	#NULL!	#NULL!	#NULL!	#NULL!
male	42	Chhetri	Hindu	yes	Intermediate and above	sometimes	never	sometimes	sometimes	never	never	never	sometimes	never	SOMETIMES	Yes	No	0	NO	0	NO	0	NO	0	#NULL!	#NULL!	#NULL!	#NULL!	#NULL!	#NULL!	#NULL!	#NULL!	#NULL!	#NULL!	#NULL!	#NULL!	#NULL!	#NULL!	#NULL!	#NULL!	#NULL!	#NULL!	#NULL!	#NULL!	#NULL!	#NULL!	#NULL!	#NULL!	#NULL!
female	32	Brahmin	Hindu	yes	SLC Pass	ALMOST ALWAYS	sometimes	never	sometimes	sometimes	never	sometimes	sometimes	sometimes	NEVER	Yes	No	0	NO	0	NO	0	NO	0	#NULL!	#NULL!	#NULL!	#NULL!	#NULL!	#NULL!	#NULL!	#NULL!	#NULL!	#NULL!	#NULL!	#NULL!	#NULL!	#NULL!	#NULL!	#NULL!	#NULL!	#NULL!	#NULL!	#NULL!	#NULL!	#NULL!	#NULL!	#NULL!	#NULL!
female	35	newar	Hindu	yes	SLC Pass	sometimes	sometimes	sometimes	sometimes	sometimes	ALMOST ALWAYS	sometimes	never	never	SOMETIMES	Yes	No	0	NO	0	NO	0	NO	0	#NULL!	#NULL!	#NULL!	#NULL!	#NULL!	#NULL!	#NULL!	#NULL!	#NULL!	#NULL!	#NULL!	#NULL!	#NULL!	#NULL!	#NULL!	#NULL!	#NULL!	#NULL!	#NULL!	#NULL!	#NULL!	#NULL!	#NULL!	#NULL!	#NULL!
female	48	Brahmin	Hindu	yes	No formal education	sometimes	sometimes	sometimes	OFTEN	sometimes	sometimes	sometimes	never	never	SOMETIMES	Yes	No	1	YES	1	NO	0	NO	0	YES	1	You never took longer than 30 minutes to fall asleep	1	You slept no longer than 7-8 hours/night, without napping during the day.	1	You felt sad less than half the time.	2	You occasionally felt indecisive or found that your attention wandered.	2	You thought almost constantly about major and minor defects in yourself.	4	You noticed that you were less interested in people or activities.	2	You got tired more easily than usual.	2	You ate somewhat less often or lesser amounts of food than usual.	1	You did not have a change in your weight.	0	You did not think of suicide or death.	0	You thought, spoke, and moved at your usual rate of speed.	0	You did not feel restless.
female	43	tharu	Hindu	no	#NULL!	sometimes	OFTEN	sometimes	sometimes	never	sometimes	never	ALMOST ALWAYS	never	NEVER	Yes	No	0	NO	0	NO	0	NO	0	#NULL!	#NULL!	#NULL!	#NULL!	#NULL!	#NULL!	#NULL!	#NULL!	#NULL!	#NULL!	#NULL!	#NULL!	#NULL!	#NULL!	#NULL!	#NULL!	#NULL!	#NULL!	#NULL!	#NULL!	#NULL!	#NULL!	#NULL!	#NULL!	#NULL!
female	40	Brahmin	Hindu	yes	Primary level	ALMOST ALWAYS	sometimes	sometimes	ALMOST ALWAYS	OFTEN	sometimes	never	never	never	SOMETIMES	Yes	No	0	NO	0	NO	0	NO	0	#NULL!	#NULL!	#NULL!	#NULL!	#NULL!	#NULL!	#NULL!	#NULL!	#NULL!	#NULL!	#NULL!	#NULL!	#NULL!	#NULL!	#NULL!	#NULL!	#NULL!	#NULL!	#NULL!	#NULL!	#NULL!	#NULL!	#NULL!	#NULL!	#NULL!
female	85	Brahmin	Hindu	no	#NULL!	OFTEN	ALMOST ALWAYS	sometimes	sometimes	never	ALMOST ALWAYS	sometimes	never	never	SOMETIMES	Yes	No	0	YES	1	YES	5	NO	0	YES	5	You never took longer than 30 minutes to fall asleep	1	You slept no longer than 7-8 hours/night, without napping during the day.	1	You felt sad less than half the time.	1	There was no change in your usual capacity to concentrate or make decisions.	0	You saw yourself as equally worthwhile and deserving as other people.	0	There was no change from usual in how interested you were in other people or activities.	0	There was no change in your usual level of activity	0	There was no change in your usual appetite.	0	You did not have a change in your weight.	0	You did not think of suicide or death.	0	You thought, spoke, and moved at your usual rate of speed.	0	You did not feel restless.
male	70	Brahmin	Hindu	yes	No formal education	never	never	sometimes	sometimes	never	never	never	never	sometimes	SOMETIMES	Yes	No	0	YES	1	NO	0	NO	0	NO	0	You took at least 30 minutes to fall asleep, less than half the time	2	You slept no longer than 7-8 hours/night, without napping during the day.	1	You felt sad less than half the time.	2	There was no change in your usual capacity to concentrate or make decisions.	0	You saw yourself as equally worthwhile and deserving as other people.	0	There was no change from usual in how interested you were in other people or activities.	0	You got tired more easily than usual.	0	There was no change in your usual appetite.	0	You did not have a change in your weight.	0	You felt that life was empty or wondered if it was worth living.	1	You thought, spoke, and moved at your usual rate of speed.	0	You did not feel restless.
female	60	tamang	Christian	no	#NULL!	OFTEN	ALMOST ALWAYS	ALMOST ALWAYS	ALMOST ALWAYS	sometimes	ALMOST ALWAYS	sometimes	ALMOST ALWAYS	OFTEN	SOMETIMES	Yes	No	0	YES	1	YES	1	YES	1	YES	1	You took more than 60 minutes to fall asleep, more than half the time.	4	You slept no longer than 7-8 hours/night, without napping during the day.	1	You felt sad more than half the time.	3	You couldn’t concentrate well enough to read or you couldn’t make even minor decisions.	4	You largely believed that you caused problems for others.	3	You noticed that you were less interested in people or activities.	2	You got tired more easily than usual.	2	You ate somewhat less often or lesser amounts of food than usual.	4	You felt as if you had a slight weight loss.	2	You thought of suicide or death several times a week for several minutes.	2	You found that your thinking was slowed down or your voice sounded dull or flat.	2	You were often fidgety, wringing your hands, or needing to shift how you were sitting.
female	28	magar	Hindu	yes	Primary level	ALMOST ALWAYS	OFTEN	sometimes	OFTEN	sometimes	sometimes	sometimes	sometimes	never	OFTEN	Yes	No	0	YES	1	YES	1	YES	1	YES	1	You took at least 30 minutes to fall asleep, less than half the time	4	You slept no longer than 7-8 hours/night, without napping during the day.	1	You did not feel sad.	0	There was no change in your usual capacity to concentrate or make decisions.	0	You saw yourself as equally worthwhile and deserving as other people.	0	There was no change from usual in how interested you were in other people or activities.	0	There was no change in your usual level of activity	0	There was no change in your usual appetite.	0	You lost 2 pounds or more.	3	You did not think of suicide or death.	0	You thought, spoke, and moved at your usual rate of speed.	0	You did not feel restless.
female	57	newar	Hindu	no	#NULL!	ALMOST ALWAYS	ALMOST ALWAYS	never	ALMOST ALWAYS	OFTEN	OFTEN	sometimes	sometimes	never	SOMETIMES	Yes	No	0	YES	1	NO	0	NO	0	NO	0	You never took longer than 30 minutes to fall asleep	1	You slept no longer than 7-8 hours/night, without napping during the day.	1	You did not feel sad.	0	There was no change in your usual capacity to concentrate or make decisions.	0	You thought almost constantly about major and minor defects in yourself.	4	There was no change from usual in how interested you were in other people or activities.	0	You got tired more easily than usual.	2	You ate much less than usual and only with personal effort.	3	You gained 2 pounds or more.	1	You did not think of suicide or death.	0	You thought, spoke, and moved at your usual rate of speed.	0	You did not feel restless.
female	32	Brahmin	Hindu	yes	SLC Pass	never	sometimes	OFTEN	OFTEN	OFTEN	never	never	never	never	SOMETIMES	Yes	No	0	YES	1	NO	0	YES	5	YES	5	You never took longer than 30 minutes to fall asleep	1	You slept no longer than 7-8 hours/night, without napping during the day.	1	You felt sad less than half the time.	2	There was no change in your usual capacity to concentrate or make decisions.	0	You saw yourself as equally worthwhile and deserving as other people.	0	There was no change from usual in how interested you were in other people or activities.	0	You had to make a big effort to start or finish your usual daily activities (for example, shopping,	1	You ate much less than usual and only with personal effort.	6	You lost 5 pounds or more.	7	You did not think of suicide or death.	0	You thought, spoke, and moved at your usual rate of speed.	0	You were often fidgety, wringing your hands, or needing to shift how you were sitting.
female	50	Chhetri	Hindu	no	#NULL!	ALMOST ALWAYS	ALMOST ALWAYS	sometimes	ALMOST ALWAYS	OFTEN	OFTEN	OFTEN	sometimes	OFTEN	SOMETIMES	Yes	No	0	YES	1	YES	1	YES	1	YES	1	You took more than 60 minutes to fall asleep, more than half the time.	4	You slept no longer than 7-8 hours/night, without napping during the day.	1	You felt sad more than half the time.	3	You occasionally felt indecisive or found that your attention wandered.	2	You thought almost constantly about major and minor defects in yourself.	4	There was no change from usual in how interested you were in other people or activities.	0	There was no change in your usual level of activity	0	There was no change in your usual appetite.	0	You did not have a change in your weight.	0	You did not think of suicide or death.	0	You found that your thinking was slowed down or your voice sounded dull or flat.	2	You were often fidgety, wringing your hands, or needing to shift how you were sitting.
female	70	darai	Hindu	no	#NULL!	OFTEN	OFTEN	OFTEN	OFTEN	sometimes	sometimes	OFTEN	sometimes	ALMOST ALWAYS	OFTEN	Yes	Yes	0	YES	1	YES	1	YES	1	YES	1	You took more than 60 minutes to fall asleep, more than half the time.	3	You slept no longer than 7-8 hours/night, without napping during the day.	1	You felt sad less than half the time.	2	Most of the time, you struggled to focus your attention or to make decisions.	2	You largely believed that you caused problems for others.	3	You noticed that you were less interested in people or activities.	2	You got tired more easily than usual.	2	You ate much less than usual and only with personal effort.	2	You lost 2 pounds or more.	2	You felt that life was empty or wondered if it was worth living.	2	It took you several seconds to respond to most questions, and you’re sure your thinking was slowed.	3	At times, you were unable to stay seated and needed to pace around.
female	50	Chhetri	Hindu	no	#NULL!	never	sometimes	never	OFTEN	sometimes	sometimes	never	never	OFTEN	NEVER	Yes	No	0	NO	0	NO	0	YES	1	YES	5	You never took longer than 30 minutes to fall asleep	1	You slept no longer than 7-8 hours/night, without napping during the day.	1	You did not feel sad.	0	There was no change in your usual capacity to concentrate or make decisions.	0	You were more self-blaming than usual.	2	There was no change from usual in how interested you were in other people or activities.	0	There was no change in your usual level of activity	0	There was no change in your usual appetite.	0	You lost 2 pounds or more.	2	You thought of suicide or death several times a week for several minutes.	2	You thought, spoke, and moved at your usual rate of speed.	0	You did not feel restless.
female	32	Brahmin	Hindu	yes	Secondary level	sometimes	sometimes	sometimes	never	never	never	sometimes	never	never	NEVER	Yes	No	0	NO	0	NO	0	NO	0	#NULL!	#NULL!	#NULL!	#NULL!	#NULL!	#NULL!	#NULL!	#NULL!	#NULL!	#NULL!	#NULL!	#NULL!	#NULL!	#NULL!	#NULL!	#NULL!	#NULL!	#NULL!	#NULL!	#NULL!	#NULL!	#NULL!	#NULL!	#NULL!	#NULL!
female	35	mushalman	Muslim	no	#NULL!	ALMOST ALWAYS	sometimes	never	OFTEN	never	never	sometimes	never	sometimes	NEVER	Yes	No	0	NO	0	NO	0	NO	0	#NULL!	#NULL!	#NULL!	#NULL!	#NULL!	#NULL!	#NULL!	#NULL!	#NULL!	#NULL!	#NULL!	#NULL!	#NULL!	#NULL!	#NULL!	#NULL!	#NULL!	#NULL!	#NULL!	#NULL!	#NULL!	#NULL!	#NULL!	#NULL!	#NULL!
female	22	dalit	Hindu	yes	Secondary level	sometimes	sometimes	sometimes	never	never	sometimes	never	never	sometimes	NEVER	Yes	No	0	YES	1	NO	0	NO	0	NO	0	You took at least 30 minutes to fall asleep, less than half the time	1	You slept no longer than 7-8 hours/night, without napping during the day.	1	You did not feel sad.	0	There was no change in your usual capacity to concentrate or make decisions.	0	You saw yourself as equally worthwhile and deserving as other people.	0	There was no change from usual in how interested you were in other people or activities.	0	There was no change in your usual level of activity	0	There was no change in your usual appetite.	0	You lost 5 pounds or more.	4	You felt that life was empty or wondered if it was worth living.	1	You thought, spoke, and moved at your usual rate of speed.	0	You did not feel restless.
female	25	chepang	Christian	yes	Primary level	sometimes	OFTEN	OFTEN	OFTEN	never	sometimes	ALMOST ALWAYS	never	sometimes	SOMETIMES	Yes	No	0	NO	0	YES	1	NO	0	NO	0	You never took longer than 30 minutes to fall asleep	1	You slept no longer than 7-8 hours/night, without napping during the day.	1	You felt sad less than half the time.	1	You occasionally felt indecisive or found that your attention wandered.	1	You were more self-blaming than usual.	2	There was no change from usual in how interested you were in other people or activities.	0	There was no change in your usual level of activity	0	There was no change in your usual appetite.	0	You lost 5 pounds or more.	1	You felt that life was empty or wondered if it was worth living.	1	You thought, spoke, and moved at your usual rate of speed.	0	You did not feel restless.
female	26	dalit	Hindu	yes	Primary level	sometimes	sometimes	never	sometimes	never	sometimes	sometimes	never	never	NEVER	Yes	No	0	NO	0	NO	0	NO	0	#NULL!	#NULL!	#NULL!	#NULL!	#NULL!	#NULL!	#NULL!	#NULL!	#NULL!	#NULL!	#NULL!	#NULL!	#NULL!	#NULL!	#NULL!	#NULL!	#NULL!	#NULL!	#NULL!	#NULL!	#NULL!	#NULL!	#NULL!	#NULL!	#NULL!
female	23	Brahmin	Hindu	yes	Secondary level	never	never	sometimes	sometimes	sometimes	never	sometimes	never	never	NEVER	Yes	No	0	YES	1	YES	5	NO	0	NO	0	You never took longer than 30 minutes to fall asleep	1	You slept no longer than 7-8 hours/night, without napping during the day.	1	You did not feel sad.	0	There was no change in your usual capacity to concentrate or make decisions.	0	You saw yourself as equally worthwhile and deserving as other people.	0	You noticed that you were less interested in people or activities.	2	There was no change in your usual level of activity	0	There was no change in your usual appetite.	0	You felt as if you had a slight weight loss.	1	You did not think of suicide or death.	0	You thought, spoke, and moved at your usual rate of speed.	0	You were often fidgety, wringing your hands, or needing to shift how you were sitting.
female	40	Brahmin	Hindu	yes	No formal education	sometimes	sometimes	sometimes	ALMOST ALWAYS	never	sometimes	never	never	sometimes	SOMETIMES	Yes	No	0	NO	0	NO	0	NO	0	#NULL!	#NULL!	#NULL!	#NULL!	#NULL!	#NULL!	#NULL!	#NULL!	#NULL!	#NULL!	#NULL!	#NULL!	#NULL!	#NULL!	#NULL!	#NULL!	#NULL!	#NULL!	#NULL!	#NULL!	#NULL!	#NULL!	#NULL!	#NULL!	#NULL!
female	57	newar	Hindu	no	#NULL!	never	sometimes	never	never	never	sometimes	never	never	never	NEVER	Yes	No	0	NO	0	NO	0	NO	0	#NULL!	#NULL!	#NULL!	#NULL!	#NULL!	#NULL!	#NULL!	#NULL!	#NULL!	#NULL!	#NULL!	#NULL!	#NULL!	#NULL!	#NULL!	#NULL!	#NULL!	#NULL!	#NULL!	#NULL!	#NULL!	#NULL!	#NULL!	#NULL!	#NULL!
female	40	tharu	Hindu	no	#NULL!	never	sometimes	sometimes	ALMOST ALWAYS	sometimes	sometimes	sometimes	sometimes	sometimes	SOMETIMES	Yes	No	0	YES	1	YES	1	NO	0	NO	0	You never took longer than 30 minutes to fall asleep	1	You slept no longer than 7-8 hours/night, without napping during the day.	1	You felt sad less than half the time.	2	You occasionally felt indecisive or found that your attention wandered.	2	You were more self-blaming than usual.	2	There was no change from usual in how interested you were in other people or activities.	0	You got tired more easily than usual.	2	There was no change in your usual appetite.	0	You felt as if you had a slight weight loss.	2	You felt that life was empty or wondered if it was worth living.	1	You thought, spoke, and moved at your usual rate of speed.	0	You were often fidgety, wringing your hands, or needing to shift how you were sitting.
female	26	majhi	Hindu	yes	Primary level	sometimes	sometimes	OFTEN	sometimes	ALMOST ALWAYS	OFTEN	ALMOST ALWAYS	never	sometimes	SOMETIMES	Yes	No	0	YES	1	YES	1	YES	1	YES	1	You never took longer than 30 minutes to fall asleep	1	You slept no longer than 7-8 hours/night, without napping during the day.	1	You felt sad less than half the time.	2	You occasionally felt indecisive or found that your attention wandered.	2	You largely believed that you caused problems for others.	3	There was no change from usual in how interested you were in other people or activities.	0	You got tired more easily than usual.	2	There was no change in your usual appetite.	0	You lost 5 pounds or more.	3	You felt that life was empty or wondered if it was worth living.	2	It took you several seconds to respond to most questions, and you’re sure your thinking was slowed.	2	You did not feel restless.
female	39	dalit	Hindu	yes	Secondary level	sometimes	never	never	sometimes	never	never	never	never	never	NEVER	Yes	No	0	NO	0	NO	0	NO	0	#NULL!	#NULL!	#NULL!	#NULL!	#NULL!	#NULL!	#NULL!	#NULL!	#NULL!	#NULL!	#NULL!	#NULL!	#NULL!	#NULL!	#NULL!	#NULL!	#NULL!	#NULL!	#NULL!	#NULL!	#NULL!	#NULL!	#NULL!	#NULL!	#NULL!
male	36	tamang	Christian	yes	Primary level	OFTEN	sometimes	ALMOST ALWAYS	sometimes	never	ALMOST ALWAYS	ALMOST ALWAYS	ALMOST ALWAYS	never	OFTEN	Yes	No	0	YES	1	YES	1	YES	1	YES	1	You never took longer than 30 minutes to fall asleep	1	You slept no longer than 7-8 hours/night, without napping during the day.	1	You did not feel sad.	0	You occasionally felt indecisive or found that your attention wandered.	2	You were more self-blaming than usual.	2	There was no change from usual in how interested you were in other people or activities.	0	There was no change in your usual level of activity	0	There was no change in your usual appetite.	0	You lost 5 pounds or more.	4	You did not think of suicide or death.	0	You thought, spoke, and moved at your usual rate of speed.	0	At times, you were unable to stay seated and needed to pace around.
female	18	mushalman	Muslim	yes	Primary level	sometimes	sometimes	ALMOST ALWAYS	sometimes	ALMOST ALWAYS	sometimes	sometimes	ALMOST ALWAYS	never	SOMETIMES	Yes	No	0	YES	1	YES	1	YES	1	YES	1	You never took longer than 30 minutes to fall asleep	1	You slept no longer than 7-8 hours/night, without napping during the day.	1	You felt sad less than half the time.	2	You occasionally felt indecisive or found that your attention wandered.	2	You were more self-blaming than usual.	2	There was no change from usual in how interested you were in other people or activities.	0	You got tired more easily than usual.	2	You ate much less than usual and only with personal effort.	3	You felt as if you had a slight weight loss.	2	You did not think of suicide or death.	0	You found that your thinking was slowed down or your voice sounded dull or flat.	2	You did not feel restless.
female	19	dalit	Hindu	yes	Primary level	never	never	never	sometimes	sometimes	sometimes	sometimes	never	never	NEVER	Yes	No	0	YES	1	YES	5	NO	0	NO	0	You never took longer than 30 minutes to fall asleep	1	You slept no longer than 7-8 hours/night, without napping during the day.	1	You felt sad less than half the time.	2	There was no change in your usual capacity to concentrate or make decisions.	0	You saw yourself as equally worthwhile and deserving as other people.	0	There was no change from usual in how interested you were in other people or activities.	0	There was no change in your usual level of activity	0	You ate much less than usual and only with personal effort.	3	You did not have a change in your weight.	0	You did not think of suicide or death.	0	You found that your thinking was slowed down or your voice sounded dull or flat.	2	You did not feel restless.
female	19	majhi	Hindu	yes	Secondary level	ALMOST ALWAYS	sometimes	never	sometimes	OFTEN	sometimes	sometimes	never	never	NEVER	Yes	No	0	YES	1	YES	1	NO	0	YES	1	You took at least 30 minutes to fall asleep, more than half the time.	3	You slept no longer than 7-8 hours/night, without napping during the day.	1	You felt sad more than half the time.	3	There was no change in your usual capacity to concentrate or make decisions.	0	You thought almost constantly about major and minor defects in yourself.	4	There was no change from usual in how interested you were in other people or activities.	0	There was no change in your usual level of activity	0	You ate somewhat less often or lesser amounts of food than usual.	2	You did not have a change in your weight.	0	You did not think of suicide or death.	0	You thought, spoke, and moved at your usual rate of speed.	0	You did not feel restless.
female	19	majhi	Hindu	no	#NULL!	OFTEN	sometimes	sometimes	sometimes	ALMOST ALWAYS	sometimes	sometimes	never	never	SOMETIMES	Yes	No	0	YES	5	YES	1	YES	1	YES	1	You took more than 60 minutes to fall asleep, more than half the time.	4	You slept no longer than 7-8 hours/night, without napping during the day.	1	You felt sad less than half the time.	2	You occasionally felt indecisive or found that your attention wandered.	2	You thought almost constantly about major and minor defects in yourself.	2	There was no change from usual in how interested you were in other people or activities.	0	There was no change in your usual level of activity	0	You ate somewhat less often or lesser amounts of food than usual.	2	You did not have a change in your weight.	0	You did not think of suicide or death.	0	You thought, spoke, and moved at your usual rate of speed.	0	You were often fidgety, wringing your hands, or needing to shift how you were sitting.
female	42	dalit	Christian	no	#NULL!	OFTEN	ALMOST ALWAYS	sometimes	OFTEN	never	ALMOST ALWAYS	never	sometimes	OFTEN	SOMETIMES	Yes	No	0	YES	1	YES	1	YES	1	YES	1	You took more than 60 minutes to fall asleep, more than half the time.	4	You slept no longer than 7-8 hours/night, without napping during the day.	1	You felt sad more than half the time.	3	You occasionally felt indecisive or found that your attention wandered.	2	You thought almost constantly about major and minor defects in yourself.	4	There was no change from usual in how interested you were in other people or activities.	0	You got tired more easily than usual.	2	You ate somewhat less often or lesser amounts of food than usual.	2	You lost 2 pounds or more.	3	You felt that life was empty or wondered if it was worth living.	2	It took you several seconds to respond to most questions, and you’re sure your thinking was slowed.	3	You did not feel restless.
female	20	Brahmin	Hindu	yes	Intermediate and above	sometimes	sometimes	never	never	never	never	sometimes	never	never	NEVER	Yes	No	0	NO	0	NO	0	NO	0	#NULL!	#NULL!	#NULL!	#NULL!	#NULL!	#NULL!	#NULL!	#NULL!	#NULL!	#NULL!	#NULL!	#NULL!	#NULL!	#NULL!	#NULL!	#NULL!	#NULL!	#NULL!	#NULL!	#NULL!	#NULL!	#NULL!	#NULL!	#NULL!	#NULL!
female	18	Brahmin	Hindu	yes	SLC Pass	sometimes	never	never	never	never	sometimes	sometimes	never	never	NEVER	Yes	No	0	NO	0	NO	0	NO	0	#NULL!	#NULL!	#NULL!	#NULL!	#NULL!	#NULL!	#NULL!	#NULL!	#NULL!	#NULL!	#NULL!	#NULL!	#NULL!	#NULL!	#NULL!	#NULL!	#NULL!	#NULL!	#NULL!	#NULL!	#NULL!	#NULL!	#NULL!	#NULL!	#NULL!
female	18	Chhetri	Hindu	yes	Secondary level	sometimes	never	never	sometimes	sometimes	sometimes	never	never	sometimes	NEVER	Yes	No	0	NO	0	NO	0	NO	0	#NULL!	#NULL!	#NULL!	#NULL!	#NULL!	#NULL!	#NULL!	#NULL!	#NULL!	#NULL!	#NULL!	#NULL!	#NULL!	#NULL!	#NULL!	#NULL!	#NULL!	#NULL!	#NULL!	#NULL!	#NULL!	#NULL!	#NULL!	#NULL!	#NULL!
male	55	Brahmin	Hindu	yes	Primary level	sometimes	sometimes	never	sometimes	never	sometimes	sometimes	never	never	NEVER	Yes	No	0	NO	0	NO	0	NO	0	#NULL!	#NULL!	#NULL!	#NULL!	#NULL!	#NULL!	#NULL!	#NULL!	#NULL!	#NULL!	#NULL!	#NULL!	#NULL!	#NULL!	#NULL!	#NULL!	#NULL!	#NULL!	#NULL!	#NULL!	#NULL!	#NULL!	#NULL!	#NULL!	#NULL!
female	19	mushalman	Others	yes	Secondary level	sometimes	never	sometimes	sometimes	never	never	sometimes	sometimes	sometimes	SOMETIMES	Yes	No	0	NO	0	NO	0	NO	0	#NULL!	#NULL!	#NULL!	#NULL!	#NULL!	#NULL!	#NULL!	#NULL!	#NULL!	#NULL!	#NULL!	#NULL!	#NULL!	#NULL!	#NULL!	#NULL!	#NULL!	#NULL!	#NULL!	#NULL!	#NULL!	#NULL!	#NULL!	#NULL!	#NULL!
female	19	Chhetri	Hindu	yes	Secondary level	sometimes	sometimes	sometimes	sometimes	sometimes	never	sometimes	sometimes	sometimes	SOMETIMES	Yes	No	0	NO	0	NO	0	NO	0	#NULL!	#NULL!	#NULL!	#NULL!	#NULL!	#NULL!	#NULL!	#NULL!	#NULL!	#NULL!	#NULL!	#NULL!	#NULL!	#NULL!	#NULL!	#NULL!	#NULL!	#NULL!	#NULL!	#NULL!	#NULL!	#NULL!	#NULL!	#NULL!	#NULL!
female	30	darai	Hindu	yes	No formal education	sometimes	ALMOST ALWAYS	sometimes	sometimes	ALMOST ALWAYS	ALMOST ALWAYS	sometimes	never	sometimes	SOMETIMES	Yes	Yes	0	NO	0	YES	1	NO	0	NO	0	You took more than 60 minutes to fall asleep, more than half the time.	1	You slept no longer than 7-8 hours/night, without napping during the day.	1	You felt sad nearly all the time.	1	Most of the time, you struggled to focus your attention or to make decisions.	1	You largely believed that you caused problems for others.	1	You noticed that you were less interested in people or activities.	1	You had to make a big effort to start or finish your usual daily activities (for example, shopping,	1	You ate much less than usual and only with personal effort.	2	You lost 5 pounds or more.	3	You thought of suicide or death several times a week for several minutes.	1	It took you several seconds to respond to most questions, and you’re sure your thinking was slowed.	1	You were often fidgety, wringing your hands, or needing to shift how you were sitting.
female	40	dalit	Hindu	yes	Primary level	sometimes	sometimes	sometimes	never	sometimes	sometimes	sometimes	sometimes	sometimes	SOMETIMES	Yes	No	0	NO	0	NO	0	NO	0	#NULL!	#NULL!	#NULL!	#NULL!	#NULL!	#NULL!	#NULL!	#NULL!	#NULL!	#NULL!	#NULL!	#NULL!	#NULL!	#NULL!	#NULL!	#NULL!	#NULL!	#NULL!	#NULL!	#NULL!	#NULL!	#NULL!	#NULL!	#NULL!	#NULL!
female	22	mushalman	Muslim	yes	No formal education	OFTEN	sometimes	sometimes	sometimes	OFTEN	never	sometimes	sometimes	never	SOMETIMES	Yes	No	0	NO	0	NO	0	NO	0	#NULL!	#NULL!	#NULL!	#NULL!	#NULL!	#NULL!	#NULL!	#NULL!	#NULL!	#NULL!	#NULL!	#NULL!	#NULL!	#NULL!	#NULL!	#NULL!	#NULL!	#NULL!	#NULL!	#NULL!	#NULL!	#NULL!	#NULL!	#NULL!	#NULL!
female	30	Brahmin	Hindu	yes	SLC Pass	sometimes	sometimes	never	sometimes	never	never	sometimes	never	never	NEVER	Yes	No	0	NO	0	NO	0	NO	0	#NULL!	#NULL!	#NULL!	#NULL!	#NULL!	#NULL!	#NULL!	#NULL!	#NULL!	#NULL!	#NULL!	#NULL!	#NULL!	#NULL!	#NULL!	#NULL!	#NULL!	#NULL!	#NULL!	#NULL!	#NULL!	#NULL!	#NULL!	#NULL!	#NULL!
male	25	Brahmin	Hindu	yes	Intermediate and above	never	never	never	sometimes	never	sometimes	never	never	never	NEVER	Yes	No	0	NO	0	NO	0	NO	0	#NULL!	#NULL!	#NULL!	#NULL!	#NULL!	#NULL!	#NULL!	#NULL!	#NULL!	#NULL!	#NULL!	#NULL!	#NULL!	#NULL!	#NULL!	#NULL!	#NULL!	#NULL!	#NULL!	#NULL!	#NULL!	#NULL!	#NULL!	#NULL!	#NULL!
male	32	magar	Hindu	yes	SLC Pass	ALMOST ALWAYS	never	sometimes	sometimes	sometimes	never	never	sometimes	never	SOMETIMES	Yes	No	0	NO	0	NO	0	NO	0	#NULL!	#NULL!	#NULL!	#NULL!	#NULL!	#NULL!	#NULL!	#NULL!	#NULL!	#NULL!	#NULL!	#NULL!	#NULL!	#NULL!	#NULL!	#NULL!	#NULL!	#NULL!	#NULL!	#NULL!	#NULL!	#NULL!	#NULL!	#NULL!	#NULL!
female	21	Brahmin	Hindu	yes	SLC Pass	never	never	sometimes	never	ALMOST ALWAYS	never	sometimes	never	never	NEVER	Yes	No	0	NO	0	YES	1	YES	5	YES	5	You took more than 60 minutes to fall asleep, more than half the time.	2	You slept no longer than 7-8 hours/night, without napping during the day.	1	You felt sad nearly all the time.	2	There was no change in your usual capacity to concentrate or make decisions.	0	You saw yourself as equally worthwhile and deserving as other people.	0	You noticed that you were less interested in people or activities.	1	There was no change in your usual level of activity	0	You ate much less than usual and only with personal effort.	3	You lost 5 pounds or more.	2	You did not think of suicide or death.	0	You thought, spoke, and moved at your usual rate of speed.	0	You were often fidgety, wringing your hands, or needing to shift how you were sitting.
female	30	Brahmin	Hindu	yes	Secondary level	never	sometimes	never	sometimes	sometimes	sometimes	sometimes	sometimes	never	NEVER	Yes	No	0	NO	0	NO	0	NO	0	#NULL!	#NULL!	#NULL!	#NULL!	#NULL!	#NULL!	#NULL!	#NULL!	#NULL!	#NULL!	#NULL!	#NULL!	#NULL!	#NULL!	#NULL!	#NULL!	#NULL!	#NULL!	#NULL!	#NULL!	#NULL!	#NULL!	#NULL!	#NULL!	#NULL!
female	22	dalit	Hindu	yes	Primary level	never	never	sometimes	sometimes	sometimes	never	never	sometimes	never	NEVER	Yes	No	0	NO	0	NO	0	NO	0	#NULL!	#NULL!	#NULL!	#NULL!	#NULL!	#NULL!	#NULL!	#NULL!	#NULL!	#NULL!	#NULL!	#NULL!	#NULL!	#NULL!	#NULL!	#NULL!	#NULL!	#NULL!	#NULL!	#NULL!	#NULL!	#NULL!	#NULL!	#NULL!	#NULL!
female	19	Brahmin	Hindu	yes	Secondary level	sometimes	sometimes	sometimes	sometimes	sometimes	sometimes	sometimes	sometimes	sometimes	SOMETIMES	Yes	No	0	NO	0	NO	0	NO	0	#NULL!	#NULL!	#NULL!	#NULL!	#NULL!	#NULL!	#NULL!	#NULL!	#NULL!	#NULL!	#NULL!	#NULL!	#NULL!	#NULL!	#NULL!	#NULL!	#NULL!	#NULL!	#NULL!	#NULL!	#NULL!	#NULL!	#NULL!	#NULL!	#NULL!
male	35	Thakuri	Hindu	yes	No formal education	OFTEN	OFTEN	never	ALMOST ALWAYS	never	never	sometimes	sometimes	never	SOMETIMES	Yes	No	0	NO	0	NO	0	NO	0	#NULL!	#NULL!	#NULL!	#NULL!	#NULL!	#NULL!	#NULL!	#NULL!	#NULL!	#NULL!	#NULL!	#NULL!	#NULL!	#NULL!	#NULL!	#NULL!	#NULL!	#NULL!	#NULL!	#NULL!	#NULL!	#NULL!	#NULL!	#NULL!	#NULL!
female	19	giri	Hindu	yes	Primary level	never	never	never	never	never	never	never	never	never	NEVER	Yes	No	0	NO	0	NO	0	NO	0	#NULL!	#NULL!	#NULL!	#NULL!	#NULL!	#NULL!	#NULL!	#NULL!	#NULL!	#NULL!	#NULL!	#NULL!	#NULL!	#NULL!	#NULL!	#NULL!	#NULL!	#NULL!	#NULL!	#NULL!	#NULL!	#NULL!	#NULL!	#NULL!	#NULL!
male	52	tharu	Hindu	no	#NULL!	sometimes	sometimes	OFTEN	sometimes	sometimes	never	sometimes	never	never	SOMETIMES	Yes	No	0	NO	0	NO	0	NO	0	#NULL!	#NULL!	#NULL!	#NULL!	#NULL!	#NULL!	#NULL!	#NULL!	#NULL!	#NULL!	#NULL!	#NULL!	#NULL!	#NULL!	#NULL!	#NULL!	#NULL!	#NULL!	#NULL!	#NULL!	#NULL!	#NULL!	#NULL!	#NULL!	#NULL!
male	26	dalit	Hindu	yes	Primary level	OFTEN	sometimes	OFTEN	OFTEN	OFTEN	never	sometimes	OFTEN	never	OFTEN	Yes	No	0	YES	1	YES	1	YES	1	YES	1	You took more than 60 minutes to fall asleep, more than half the time.	4	You slept no longer than 7-8 hours/night, without napping during the day.	1	You did not feel sad.	0	There was no change in your usual capacity to concentrate or make decisions.	0	You were more self-blaming than usual.	2	There was no change from usual in how interested you were in other people or activities.	0	There was no change in your usual level of activity	0	You ate somewhat less often or lesser amounts of food than usual.	2	You did not have a change in your weight.	0	You did not think of suicide or death.	0	It took you several seconds to respond to most questions, and you’re sure your thinking was slowed.	1	You were often fidgety, wringing your hands, or needing to shift how you were sitting.
male	25	gurung	Buddhist	yes	Intermediate and above	never	sometimes	never	never	never	never	never	never	never	NEVER	Yes	No	0	NO	0	NO	0	NO	0	#NULL!	#NULL!	#NULL!	#NULL!	#NULL!	#NULL!	#NULL!	#NULL!	#NULL!	#NULL!	#NULL!	#NULL!	#NULL!	#NULL!	#NULL!	#NULL!	#NULL!	#NULL!	#NULL!	#NULL!	#NULL!	#NULL!	#NULL!	#NULL!	#NULL!
male	65	kumal	Hindu	no	#NULL!	sometimes	OFTEN	OFTEN	sometimes	sometimes	never	sometimes	sometimes	never	SOMETIMES	Yes	No	0	NO	0	NO	0	NO	0	#NULL!	#NULL!	#NULL!	#NULL!	#NULL!	#NULL!	#NULL!	#NULL!	#NULL!	#NULL!	#NULL!	#NULL!	#NULL!	#NULL!	#NULL!	#NULL!	#NULL!	#NULL!	#NULL!	#NULL!	#NULL!	#NULL!	#NULL!	#NULL!	#NULL!
male	53	tamang	Hindu	yes	No formal education	sometimes	OFTEN	sometimes	OFTEN	OFTEN	sometimes	OFTEN	OFTEN	sometimes	OFTEN	Yes	No	0	NO	0	NO	0	NO	0	#NULL!	#NULL!	#NULL!	#NULL!	#NULL!	#NULL!	#NULL!	#NULL!	#NULL!	#NULL!	#NULL!	#NULL!	#NULL!	#NULL!	#NULL!	#NULL!	#NULL!	#NULL!	#NULL!	#NULL!	#NULL!	#NULL!	#NULL!	#NULL!	#NULL!
male	22	dalit	Hindu	yes	Secondary level	never	never	sometimes	OFTEN	OFTEN	never	never	never	never	NEVER	Yes	No	0	NO	0	NO	0	NO	0	#NULL!	#NULL!	#NULL!	#NULL!	#NULL!	#NULL!	#NULL!	#NULL!	#NULL!	#NULL!	#NULL!	#NULL!	#NULL!	#NULL!	#NULL!	#NULL!	#NULL!	#NULL!	#NULL!	#NULL!	#NULL!	#NULL!	#NULL!	#NULL!	#NULL!
male	54	newar	Hindu	yes	Primary level	never	sometimes	never	sometimes	sometimes	never	sometimes	sometimes	never	SOMETIMES	Yes	No	0	NO	0	NO	0	NO	0	#NULL!	#NULL!	#NULL!	#NULL!	#NULL!	#NULL!	#NULL!	#NULL!	#NULL!	#NULL!	#NULL!	#NULL!	#NULL!	#NULL!	#NULL!	#NULL!	#NULL!	#NULL!	#NULL!	#NULL!	#NULL!	#NULL!	#NULL!	#NULL!	#NULL!
male	40	gurung	Hindu	yes	Primary level	never	never	sometimes	sometimes	never	sometimes	OFTEN	sometimes	sometimes	SOMETIMES	Yes	No	0	NO	0	NO	0	NO	0	#NULL!	#NULL!	#NULL!	#NULL!	#NULL!	#NULL!	#NULL!	#NULL!	#NULL!	#NULL!	#NULL!	#NULL!	#NULL!	#NULL!	#NULL!	#NULL!	#NULL!	#NULL!	#NULL!	#NULL!	#NULL!	#NULL!	#NULL!	#NULL!	#NULL!
male	18	magar	Christian	yes	Primary level	never	sometimes	sometimes	sometimes	never	never	sometimes	sometimes	never	NEVER	Yes	No	0	NO	0	NO	0	NO	0	#NULL!	#NULL!	#NULL!	#NULL!	#NULL!	#NULL!	#NULL!	#NULL!	#NULL!	#NULL!	#NULL!	#NULL!	#NULL!	#NULL!	#NULL!	#NULL!	#NULL!	#NULL!	#NULL!	#NULL!	#NULL!	#NULL!	#NULL!	#NULL!	#NULL!
male	65	tharu	Hindu	no	#NULL!	sometimes	sometimes	OFTEN	ALMOST ALWAYS	sometimes	sometimes	sometimes	sometimes	never	SOMETIMES	Yes	No	0	NO	0	NO	0	NO	0	#NULL!	#NULL!	#NULL!	#NULL!	#NULL!	#NULL!	#NULL!	#NULL!	#NULL!	#NULL!	#NULL!	#NULL!	#NULL!	#NULL!	#NULL!	#NULL!	#NULL!	#NULL!	#NULL!	#NULL!	#NULL!	#NULL!	#NULL!	#NULL!	#NULL!
male	56	tharu	Hindu	yes	Primary level	ALMOST ALWAYS	OFTEN	sometimes	sometimes	sometimes	sometimes	sometimes	sometimes	never	SOMETIMES	Yes	No	0	NO	0	NO	0	NO	0	#NULL!	#NULL!	#NULL!	#NULL!	#NULL!	#NULL!	#NULL!	#NULL!	#NULL!	#NULL!	#NULL!	#NULL!	#NULL!	#NULL!	#NULL!	#NULL!	#NULL!	#NULL!	#NULL!	#NULL!	#NULL!	#NULL!	#NULL!	#NULL!	#NULL!
male	51	gurung	Buddhist	yes	Secondary level	never	never	never	never	sometimes	never	never	never	never	NEVER	Yes	No	0	NO	0	NO	0	NO	0	#NULL!	#NULL!	#NULL!	#NULL!	#NULL!	#NULL!	#NULL!	#NULL!	#NULL!	#NULL!	#NULL!	#NULL!	#NULL!	#NULL!	#NULL!	#NULL!	#NULL!	#NULL!	#NULL!	#NULL!	#NULL!	#NULL!	#NULL!	#NULL!	#NULL!
male	19	gurung	Buddhist	yes	Intermediate and above	never	never	sometimes	never	never	sometimes	never	never	never	NEVER	Yes	No	0	NO	0	NO	0	NO	0	#NULL!	#NULL!	#NULL!	#NULL!	#NULL!	#NULL!	#NULL!	#NULL!	#NULL!	#NULL!	#NULL!	#NULL!	#NULL!	#NULL!	#NULL!	#NULL!	#NULL!	#NULL!	#NULL!	#NULL!	#NULL!	#NULL!	#NULL!	#NULL!	#NULL!
male	40	kumal	Hindu	yes	SLC Pass	sometimes	sometimes	sometimes	never	never	never	sometimes	sometimes	never	NEVER	Yes	No	0	NO	0	YES	5	NO	0	NO	0	You took more than 60 minutes to fall asleep, more than half the time.	4	You slept no longer than 7-8 hours/night, without napping during the day.	1	You felt sad more than half the time.	1	Most of the time, you struggled to focus your attention or to make decisions.	1	You largely believed that you caused problems for others.	1	There was no change from usual in how interested you were in other people or activities.	0	There was no change in your usual level of activity	0	You ate much less than usual and only with personal effort.	1	You lost 2 pounds or more.	1	You thought of suicide or death several times a week for several minutes.	1	You found that your thinking was slowed down or your voice sounded dull or flat.	1	You were often fidgety, wringing your hands, or needing to shift how you were sitting.
male	55	tharu	Hindu	no	#NULL!	sometimes	OFTEN	OFTEN	OFTEN	OFTEN	never	OFTEN	sometimes	sometimes	SOMETIMES	Yes	No	0	NO	0	NO	0	NO	0	#NULL!	#NULL!	#NULL!	#NULL!	#NULL!	#NULL!	#NULL!	#NULL!	#NULL!	#NULL!	#NULL!	#NULL!	#NULL!	#NULL!	#NULL!	#NULL!	#NULL!	#NULL!	#NULL!	#NULL!	#NULL!	#NULL!	#NULL!	#NULL!	#NULL!
male	25	kumal	Hindu	yes	SLC Pass	sometimes	sometimes	sometimes	sometimes	never	sometimes	never	never	never	NEVER	Yes	No	0	NO	0	NO	0	NO	0	#NULL!	#NULL!	#NULL!	#NULL!	#NULL!	#NULL!	#NULL!	#NULL!	#NULL!	#NULL!	#NULL!	#NULL!	#NULL!	#NULL!	#NULL!	#NULL!	#NULL!	#NULL!	#NULL!	#NULL!	#NULL!	#NULL!	#NULL!	#NULL!	#NULL!
male	25	tharu	Hindu	yes	Secondary level	OFTEN	never	sometimes	OFTEN	ALMOST ALWAYS	never	sometimes	never	never	SOMETIMES	Yes	No	0	NO	0	NO	0	NO	0	#NULL!	#NULL!	#NULL!	#NULL!	#NULL!	#NULL!	#NULL!	#NULL!	#NULL!	#NULL!	#NULL!	#NULL!	#NULL!	#NULL!	#NULL!	#NULL!	#NULL!	#NULL!	#NULL!	#NULL!	#NULL!	#NULL!	#NULL!	#NULL!	#NULL!
male	60	dalit	Hindu	yes	Secondary level	ALMOST ALWAYS	ALMOST ALWAYS	never	OFTEN	never	never	OFTEN	never	never	SOMETIMES	Yes	No	0	NO	0	NO	0	NO	0	#NULL!	#NULL!	#NULL!	#NULL!	#NULL!	#NULL!	#NULL!	#NULL!	#NULL!	#NULL!	#NULL!	#NULL!	#NULL!	#NULL!	#NULL!	#NULL!	#NULL!	#NULL!	#NULL!	#NULL!	#NULL!	#NULL!	#NULL!	#NULL!	#NULL!
male	21	darai	Hindu	yes	Secondary level	never	sometimes	never	sometimes	sometimes	sometimes	never	never	sometimes	SOMETIMES	Yes	No	0	NO	0	NO	0	NO	0	#NULL!	#NULL!	#NULL!	#NULL!	#NULL!	#NULL!	#NULL!	#NULL!	#NULL!	#NULL!	#NULL!	#NULL!	#NULL!	#NULL!	#NULL!	#NULL!	#NULL!	#NULL!	#NULL!	#NULL!	#NULL!	#NULL!	#NULL!	#NULL!	#NULL!
male	49	kumal	Hindu	no	#NULL!	sometimes	sometimes	sometimes	sometimes	never	sometimes	sometimes	sometimes	never	SOMETIMES	Yes	No	0	NO	0	NO	0	NO	0	#NULL!	#NULL!	#NULL!	#NULL!	#NULL!	#NULL!	#NULL!	#NULL!	#NULL!	#NULL!	#NULL!	#NULL!	#NULL!	#NULL!	#NULL!	#NULL!	#NULL!	#NULL!	#NULL!	#NULL!	#NULL!	#NULL!	#NULL!	#NULL!	#NULL!
male	44	tamang	Hindu	yes	Primary level	OFTEN	OFTEN	sometimes	OFTEN	never	sometimes	never	OFTEN	never	SOMETIMES	Yes	No	0	NO	0	NO	0	NO	0	#NULL!	#NULL!	#NULL!	#NULL!	#NULL!	#NULL!	#NULL!	#NULL!	#NULL!	#NULL!	#NULL!	#NULL!	#NULL!	#NULL!	#NULL!	#NULL!	#NULL!	#NULL!	#NULL!	#NULL!	#NULL!	#NULL!	#NULL!	#NULL!	#NULL!
male	33	newar	Hindu	yes	Secondary level	OFTEN	never	never	never	OFTEN	never	never	never	never	NEVER	Yes	No	0	NO	0	NO	0	NO	0	#NULL!	#NULL!	#NULL!	#NULL!	#NULL!	#NULL!	#NULL!	#NULL!	#NULL!	#NULL!	#NULL!	#NULL!	#NULL!	#NULL!	#NULL!	#NULL!	#NULL!	#NULL!	#NULL!	#NULL!	#NULL!	#NULL!	#NULL!	#NULL!	#NULL!
male	20	kumal	Hindu	yes	Secondary level	OFTEN	never	OFTEN	never	OFTEN	sometimes	sometimes	sometimes	never	OFTEN	Yes	No	0	NO	0	NO	0	NO	0	#NULL!	#NULL!	#NULL!	#NULL!	#NULL!	#NULL!	#NULL!	#NULL!	#NULL!	#NULL!	#NULL!	#NULL!	#NULL!	#NULL!	#NULL!	#NULL!	#NULL!	#NULL!	#NULL!	#NULL!	#NULL!	#NULL!	#NULL!	#NULL!	#NULL!
male	19	kumal	Hindu	yes	Intermediate and above	sometimes	never	sometimes	sometimes	never	sometimes	never	never	never	SOMETIMES	Yes	No	0	NO	0	NO	0	NO	0	#NULL!	#NULL!	#NULL!	#NULL!	#NULL!	#NULL!	#NULL!	#NULL!	#NULL!	#NULL!	#NULL!	#NULL!	#NULL!	#NULL!	#NULL!	#NULL!	#NULL!	#NULL!	#NULL!	#NULL!	#NULL!	#NULL!	#NULL!	#NULL!	#NULL!
male	19	kumal	Christian	yes	Primary level	never	sometimes	never	sometimes	never	never	never	never	never	NEVER	Yes	No	0	NO	0	NO	0	NO	0	#NULL!	#NULL!	#NULL!	#NULL!	#NULL!	#NULL!	#NULL!	#NULL!	#NULL!	#NULL!	#NULL!	#NULL!	#NULL!	#NULL!	#NULL!	#NULL!	#NULL!	#NULL!	#NULL!	#NULL!	#NULL!	#NULL!	#NULL!	#NULL!	#NULL!
male	53	dalit	Hindu	no	#NULL!	sometimes	sometimes	OFTEN	sometimes	sometimes	never	sometimes	sometimes	never	NEVER	Yes	No	0	NO	0	NO	0	NO	0	#NULL!	#NULL!	#NULL!	#NULL!	#NULL!	#NULL!	#NULL!	#NULL!	#NULL!	#NULL!	#NULL!	#NULL!	#NULL!	#NULL!	#NULL!	#NULL!	#NULL!	#NULL!	#NULL!	#NULL!	#NULL!	#NULL!	#NULL!	#NULL!	#NULL!
male	36	tamang	Christian	no	#NULL!	never	sometimes	never	sometimes	never	never	never	never	never	NEVER	Yes	Yes	1	YES	1	YES	5	YES	5	YES	5	You took at least 30 minutes to fall asleep, less than half the time	1	You slept no longer than 7-8 hours/night, without napping during the day.	1	You felt sad less than half the time.	2	There was no change in your usual capacity to concentrate or make decisions.	0	You largely believed that you caused problems for others.	3	There was no change from usual in how interested you were in other people or activities.	0	There was no change in your usual level of activity	0	You felt a need to eat more frequently than usual.	1	You lost 5 pounds or more.	7	You did not think of suicide or death.	0	You found that your thinking was slowed down or your voice sounded dull or flat.	1	You were often fidgety, wringing your hands, or needing to shift how you were sitting.
male	70	Brahmin	Hindu	yes	No formal education	never	ALMOST ALWAYS	ALMOST ALWAYS	ALMOST ALWAYS	OFTEN	OFTEN	ALMOST ALWAYS	OFTEN	sometimes	SOMETIMES	Yes	No	0	YES	5	NO	0	YES	1	YES	1	You took more than 60 minutes to fall asleep, more than half the time.	4	You slept no longer than 7-8 hours/night, without napping during the day.	1	You felt sad less than half the time.	2	You couldn’t concentrate well enough to read or you couldn’t make even minor decisions.	2	You thought almost constantly about major and minor defects in yourself.	4	You found you had interest in only one or two of your formerly pursued activities.	3	You had to make a big effort to start or finish your usual daily activities (for example, shopping,	3	You ate much less than usual and only with personal effort.	3	You felt as if you had a slight weight loss.	1	You did not think of suicide or death.	0	You thought, spoke, and moved at your usual rate of speed.	0	You were often fidgety, wringing your hands, or needing to shift how you were sitting.
female	60	Brahmin	Hindu	no	#NULL!	ALMOST ALWAYS	ALMOST ALWAYS	sometimes	ALMOST ALWAYS	sometimes	ALMOST ALWAYS	ALMOST ALWAYS	ALMOST ALWAYS	ALMOST ALWAYS	OFTEN	Yes	Yes	1	YES	1	YES	1	YES	1	YES	1	You took more than 60 minutes to fall asleep, more than half the time.	4	You slept no longer than 7-8 hours/night, without napping during the day.	1	You felt sad nearly all the time.	4	Most of the time, you struggled to focus your attention or to make decisions.	2	You largely believed that you caused problems for others.	3	You had virtually no interest in formerly pursued activities.	4	You got tired more easily than usual.	2	You rarely ate within a 24-hr period, and only with extreme personal effort or when others persuaded you to eat.	2	You lost 2 pounds or more.	2	You did not think of suicide or death.	0	It took you several seconds to respond to most questions, and you’re sure your thinking was slowed.	3	At times, you were unable to stay seated and needed to pace around.
male	53	Brahmin	Hindu	no	#NULL!	ALMOST ALWAYS	ALMOST ALWAYS	OFTEN	ALMOST ALWAYS	ALMOST ALWAYS	sometimes	ALMOST ALWAYS	sometimes	ALMOST ALWAYS	OFTEN	Yes	Yes	0	YES	1	YES	1	YES	1	YES	1	You took more than 60 minutes to fall asleep, more than half the time.	4	You slept no longer than 7-8 hours/night, without napping during the day.	1	You felt sad nearly all the time.	4	You couldn’t concentrate well enough to read or you couldn’t make even minor decisions.	4	You thought almost constantly about major and minor defects in yourself.	4	You noticed that you were less interested in people or activities.	2	You got tired more easily than usual.	4	You ate much less than usual and only with personal effort.	3	You lost 5 pounds or more.	1	You felt that life was empty or wondered if it was worth living.	2	You found that your thinking was slowed down or your voice sounded dull or flat.	2	You were often fidgety, wringing your hands, or needing to shift how you were sitting.
male	50	Chhetri	Hindu	yes	No formal education	ALMOST ALWAYS	sometimes	ALMOST ALWAYS	ALMOST ALWAYS	ALMOST ALWAYS	never	ALMOST ALWAYS	sometimes	ALMOST ALWAYS	OFTEN	Yes	Yes	0	YES	1	NO	0	YES	1	YES	1	You took more than 60 minutes to fall asleep, more than half the time.	4	You slept no longer than 7-8 hours/night, without napping during the day.	1	You felt sad nearly all the time.	4	Most of the time, you struggled to focus your attention or to make decisions.	3	You were more self-blaming than usual.	2	You noticed that you were less interested in people or activities.	2	You had to make a big effort to start or finish your usual daily activities (for example, shopping,	4	You ate much less than usual and only with personal effort.	3	You lost 5 pounds or more.	3	You felt that life was empty or wondered if it was worth living.	2	You thought, spoke, and moved at your usual rate of speed.	0	You were often fidgety, wringing your hands, or needing to shift how you were sitting.
female	67	Brahmin	Hindu	no	#NULL!	ALMOST ALWAYS	ALMOST ALWAYS	OFTEN	ALMOST ALWAYS	sometimes	ALMOST ALWAYS	ALMOST ALWAYS	sometimes	ALMOST ALWAYS	SOMETIMES	Yes	Yes	0	NO	0	YES	1	YES	1	YES	1	You took more than 60 minutes to fall asleep, more than half the time.	4	You slept no longer than 7-8 hours/night, without napping during the day.	1	You felt sad nearly all the time.	4	You couldn’t concentrate well enough to read or you couldn’t make even minor decisions.	4	You largely believed that you caused problems for others.	3	You had virtually no interest in formerly pursued activities.	4	You really couldn’t carry out most of your usual daily activities because you just didn’t have the energy.	4	You rarely ate within a 24-hr period, and only with extreme personal effort or when others persuaded you to eat.	2	You lost 5 pounds or more.	2	You thought of suicide or death several times a week for several minutes.	3	You thought, spoke, and moved at your usual rate of speed.	0	You were often fidgety, wringing your hands, or needing to shift how you were sitting.
female	55	Chhetri	Hindu	no	#NULL!	ALMOST ALWAYS	ALMOST ALWAYS	OFTEN	ALMOST ALWAYS	OFTEN	sometimes	ALMOST ALWAYS	ALMOST ALWAYS	never	OFTEN	Yes	No	0	YES	5	NO	0	YES	1	YES	1	You took more than 60 minutes to fall asleep, more than half the time.	4	You slept no longer than 7-8 hours/night, without napping during the day.	1	You felt sad less than half the time.	2	There was no change in your usual capacity to concentrate or make decisions.	0	You largely believed that you caused problems for others.	3	You noticed that you were less interested in people or activities.	2	You had to make a big effort to start or finish your usual daily activities (for example, shopping,	3	You ate somewhat less often or lesser amounts of food than usual.	2	You lost 2 pounds or more.	3	You did not think of suicide or death.	0	You thought, spoke, and moved at your usual rate of speed.	0	You did not feel restless.
female	21	tharu	Hindu	no	#NULL!	ALMOST ALWAYS	ALMOST ALWAYS	sometimes	sometimes	OFTEN	ALMOST ALWAYS	ALMOST ALWAYS	ALMOST ALWAYS	ALMOST ALWAYS	OFTEN	Yes	Yes	0	YES	1	YES	1	YES	1	YES	1	You took at least 30 minutes to fall asleep, more than half the time.	4	You slept no longer than 7-8 hours/night, without napping during the day.	1	You felt sad nearly all the time.	4	Most of the time, you struggled to focus your attention or to make decisions.	3	You thought almost constantly about major and minor defects in yourself.	4	You noticed that you were less interested in people or activities.	2	You got tired more easily than usual.	2	You ate much less than usual and only with personal effort.	1	You lost 5 pounds or more.	4	You thought of suicide or death several times a day in some detail, or you made specific plans for suicide or actually tried to take your own life.	4	You found that your thinking was slowed down or your voice sounded dull or flat.	2	You did not feel restless.
female	20	tamang	Buddhist	yes	Primary level	OFTEN	sometimes	OFTEN	ALMOST ALWAYS	never	ALMOST ALWAYS	ALMOST ALWAYS	ALMOST ALWAYS	ALMOST ALWAYS	OFTEN	Yes	Yes	0	YES	1	YES	1	YES	1	YES	1	You never took longer than 30 minutes to fall asleep	1	You slept no longer than 10 hours in a 24-hour period including naps.	2	You felt sad more than half the time.	4	Most of the time, you struggled to focus your attention or to make decisions.	3	You saw yourself as equally worthwhile and deserving as other people.	0	You found you had interest in only one or two of your formerly pursued activities.	3	You had to make a big effort to start or finish your usual daily activities (for example, shopping,	3	There was no change in your usual appetite.	0	You lost 2 pounds or more.	3	You thought of suicide or death several times a day in some detail, or you made specific plans for suicide or actually tried to take your own life.	4	You thought, spoke, and moved at your usual rate of speed.	0	You were often fidgety, wringing your hands, or needing to shift how you were sitting.
female	19	tamang	Buddhist	yes	Secondary level	ALMOST ALWAYS	OFTEN	never	sometimes	sometimes	sometimes	sometimes	never	sometimes	SOMETIMES	Yes	Yes	0	YES	1	YES	1	YES	1	YES	5	You took at least 30 minutes to fall asleep, less than half the time	2	You slept no longer than 7-8 hours/night, without napping during the day.	1	You felt sad nearly all the time.	4	You occasionally felt indecisive or found that your attention wandered.	2	You largely believed that you caused problems for others.	3	You noticed that you were less interested in people or activities.	2	You had to make a big effort to start or finish your usual daily activities (for example, shopping,	3	You ate somewhat less often or lesser amounts of food than usual.	2	You gained 2 pounds or more.	6	You felt that life was empty or wondered if it was worth living.	2	It took you several seconds to respond to most questions, and you’re sure your thinking was slowed.	3	You were often fidgety, wringing your hands, or needing to shift how you were sitting.
female	19	tamang	Buddhist	yes	Primary level	sometimes	sometimes	sometimes	sometimes	ALMOST ALWAYS	never	sometimes	never	never	NEVER	Yes	No	0	YES	1	YES	1	YES	1	YES	1	You never took longer than 30 minutes to fall asleep	1	You slept no longer than 7-8 hours/night, without napping during the day.	1	You felt sad less than half the time.	2	You occasionally felt indecisive or found that your attention wandered.	2	You thought almost constantly about major and minor defects in yourself.	4	You noticed that you were less interested in people or activities.	2	You got tired more easily than usual.	2	You ate somewhat less often or lesser amounts of food than usual.	2	You felt as if you had a slight weight loss.	2	You did not think of suicide or death.	0	You thought, spoke, and moved at your usual rate of speed.	0	You were often fidgety, wringing your hands, or needing to shift how you were sitting.
female	19	tharu	Hindu	yes	Secondary level	ALMOST ALWAYS	ALMOST ALWAYS	OFTEN	sometimes	OFTEN	sometimes	sometimes	OFTEN	never	SOMETIMES	Yes	No	0	YES	1	YES	1	YES	5	YES	1	You took more than 60 minutes to fall asleep, more than half the time.	4	You slept no longer than 7-8 hours/night, without napping during the day.	1	You felt sad less than half the time.	2	You occasionally felt indecisive or found that your attention wandered.	2	You saw yourself as equally worthwhile and deserving as other people.	0	You noticed that you were less interested in people or activities.	2	You got tired more easily than usual.	2	You ate somewhat less often or lesser amounts of food than usual.	2	You lost 5 pounds or more.	4	You felt that life was empty or wondered if it was worth living.	2	You were often unable to respond to questions without extreme effort.	4	You did not feel restless.
male	40	majhi	Christian	no	#NULL!	sometimes	ALMOST ALWAYS	sometimes	ALMOST ALWAYS	sometimes	sometimes	sometimes	sometimes	sometimes	SOMETIMES	Yes	No	0	YES	1	YES	1	YES	1	YES	1	You took more than 60 minutes to fall asleep, more than half the time.	4	You slept no longer than 7-8 hours/night, without napping during the day.	1	You did not feel sad.	0	You occasionally felt indecisive or found that your attention wandered.	2	You were more self-blaming than usual.	2	There was no change from usual in how interested you were in other people or activities.	0	There was no change in your usual level of activity	0	You ate somewhat less often or lesser amounts of food than usual.	2	You lost 2 pounds or more.	5	You felt that life was empty or wondered if it was worth living.	2	You found that your thinking was slowed down or your voice sounded dull or flat.	2	You were often fidgety, wringing your hands, or needing to shift how you were sitting.
male	70	newar	Hindu	yes	No formal education	OFTEN	OFTEN	never	ALMOST ALWAYS	never	sometimes	sometimes	OFTEN	sometimes	SOMETIMES	Yes	Yes	0	YES	1	YES	1	NO	0	YES	1	You took more than 60 minutes to fall asleep, more than half the time.	1	You slept no longer than 7-8 hours/night, without napping during the day.	1	You did not feel sad.	0	You occasionally felt indecisive or found that your attention wandered.	2	You saw yourself as equally worthwhile and deserving as other people.	0	You noticed that you were less interested in people or activities.	2	You got tired more easily than usual.	2	There was no change in your usual appetite.	0	You lost 5 pounds or more.	1	You felt that life was empty or wondered if it was worth living.	1	You thought, spoke, and moved at your usual rate of speed.	0	You were often fidgety, wringing your hands, or needing to shift how you were sitting.
male	26	tharu	Hindu	no	#NULL!	OFTEN	OFTEN	OFTEN	OFTEN	OFTEN	never	OFTEN	sometimes	sometimes	OFTEN	Yes	No	0	YES	1	YES	1	YES	1	YES	1	You took more than 60 minutes to fall asleep, more than half the time.	4	You slept no longer than 7-8 hours/night, without napping during the day.	1	You felt sad nearly all the time.	4	You couldn’t concentrate well enough to read or you couldn’t make even minor decisions.	4	You largely believed that you caused problems for others.	3	There was no change from usual in how interested you were in other people or activities.	0	You got tired more easily than usual.	2	You rarely ate within a 24-hr period, and only with extreme personal effort or when others persuaded you to eat.	4	You lost 2 pounds or more.	3	You felt that life was empty or wondered if it was worth living.	2	You thought, spoke, and moved at your usual rate of speed.	0	You were often fidgety, wringing your hands, or needing to shift how you were sitting.
male	21	dalit	Hindu	yes	Primary level	never	never	sometimes	sometimes	OFTEN	ALMOST ALWAYS	ALMOST ALWAYS	OFTEN	sometimes	SOMETIMES	Yes	No	0	NO	0	YES	1	YES	1	NO	0	You took more than 60 minutes to fall asleep, more than half the time.	4	You slept no longer than 7-8 hours/night, without napping during the day.	1	You felt sad less than half the time.	2	You occasionally felt indecisive or found that your attention wandered.	2	You were more self-blaming than usual.	2	You noticed that you were less interested in people or activities.	2	You got tired more easily than usual.	2	You ate somewhat less often or lesser amounts of food than usual.	2	You lost 2 pounds or more.	2	You felt that life was empty or wondered if it was worth living.	2	It took you several seconds to respond to most questions, and you’re sure your thinking was slowed.	2	You did not feel restless.
male	53	newar	Hindu	yes	Secondary level	OFTEN	ALMOST ALWAYS	sometimes	OFTEN	never	OFTEN	OFTEN	sometimes	sometimes	SOMETIMES	Yes	No	0	YES	1	YES	1	YES	1	YES	1	You took at least 30 minutes to fall asleep, more than half the time.	3	You slept no longer than 7-8 hours/night, without napping during the day.	1	You felt sad less than half the time.	2	You occasionally felt indecisive or found that your attention wandered.	2	You largely believed that you caused problems for others.	3	You noticed that you were less interested in people or activities.	2	You got tired more easily than usual.	2	There was no change in your usual appetite.	0	You did not have a change in your weight.	0	You did not think of suicide or death.	0	You thought, spoke, and moved at your usual rate of speed.	0	You were often fidgety, wringing your hands, or needing to shift how you were sitting.
[truncated: 18 more columns]
